# Supplementary material
Source: PubMed Central journal article supplement (PMC3092375)

Bioactive Constituents from the Roots of *Panax japonicus* var. *major*  
and Development of a LC-MS/MS Method for Distinguishing between  
Natural and Artifactual Compounds

Hsiu-Hui Chan, Tsong-Long Hwang, Han-Dong Sun, Mopur Vijaya Bhaskar Reddy,

Ding-Tzai Li, Keduo Qian, Kenneth F. Bastow, Kuo-Hsiung Lee, and Tian-Shung

Wu\*

**Supporting information**

**List of Content**

|                                                                            |     |
|----------------------------------------------------------------------------|-----|
| <sup>1</sup> H-NMR spectrum of panajaponol A (1).....                      | S2  |
| <sup>13</sup> C-NMR spectrum of panajaponol A (1).....                     | S3  |
| COSY spectrum of panajaponol A (1) .....                                   | S4  |
| NOESY spectrum of panajaponol A (1).....                                   | S5  |
| HMQC spectrum of panajaponol A (1).....                                    | S6  |
| HMBC spectrum of panajaponol A (1) .....                                   | S7  |
| <sup>1</sup> H-NMR spectrum of pseudoginsenoside RT1 butyl ester (2) ..... | S8  |
| <sup>13</sup> C-NMR spectrum of pseudoginsenoside RT1 butyl ester (2)..... | S9  |
| COSY spectrum of pseudoginsenoside RT1 butyl ester (2) .....               | S10 |
| NOESY spectrum of pseudoginsenoside RT1 butyl ester (2).....               | S11 |
| HMQC spectrum of pseudoginsenoside RT1 butyl ester (2).....                | S12 |
| HMBC spectrum of pseudoginsenoside RT1 butyl ester (2) .....               | S13 |

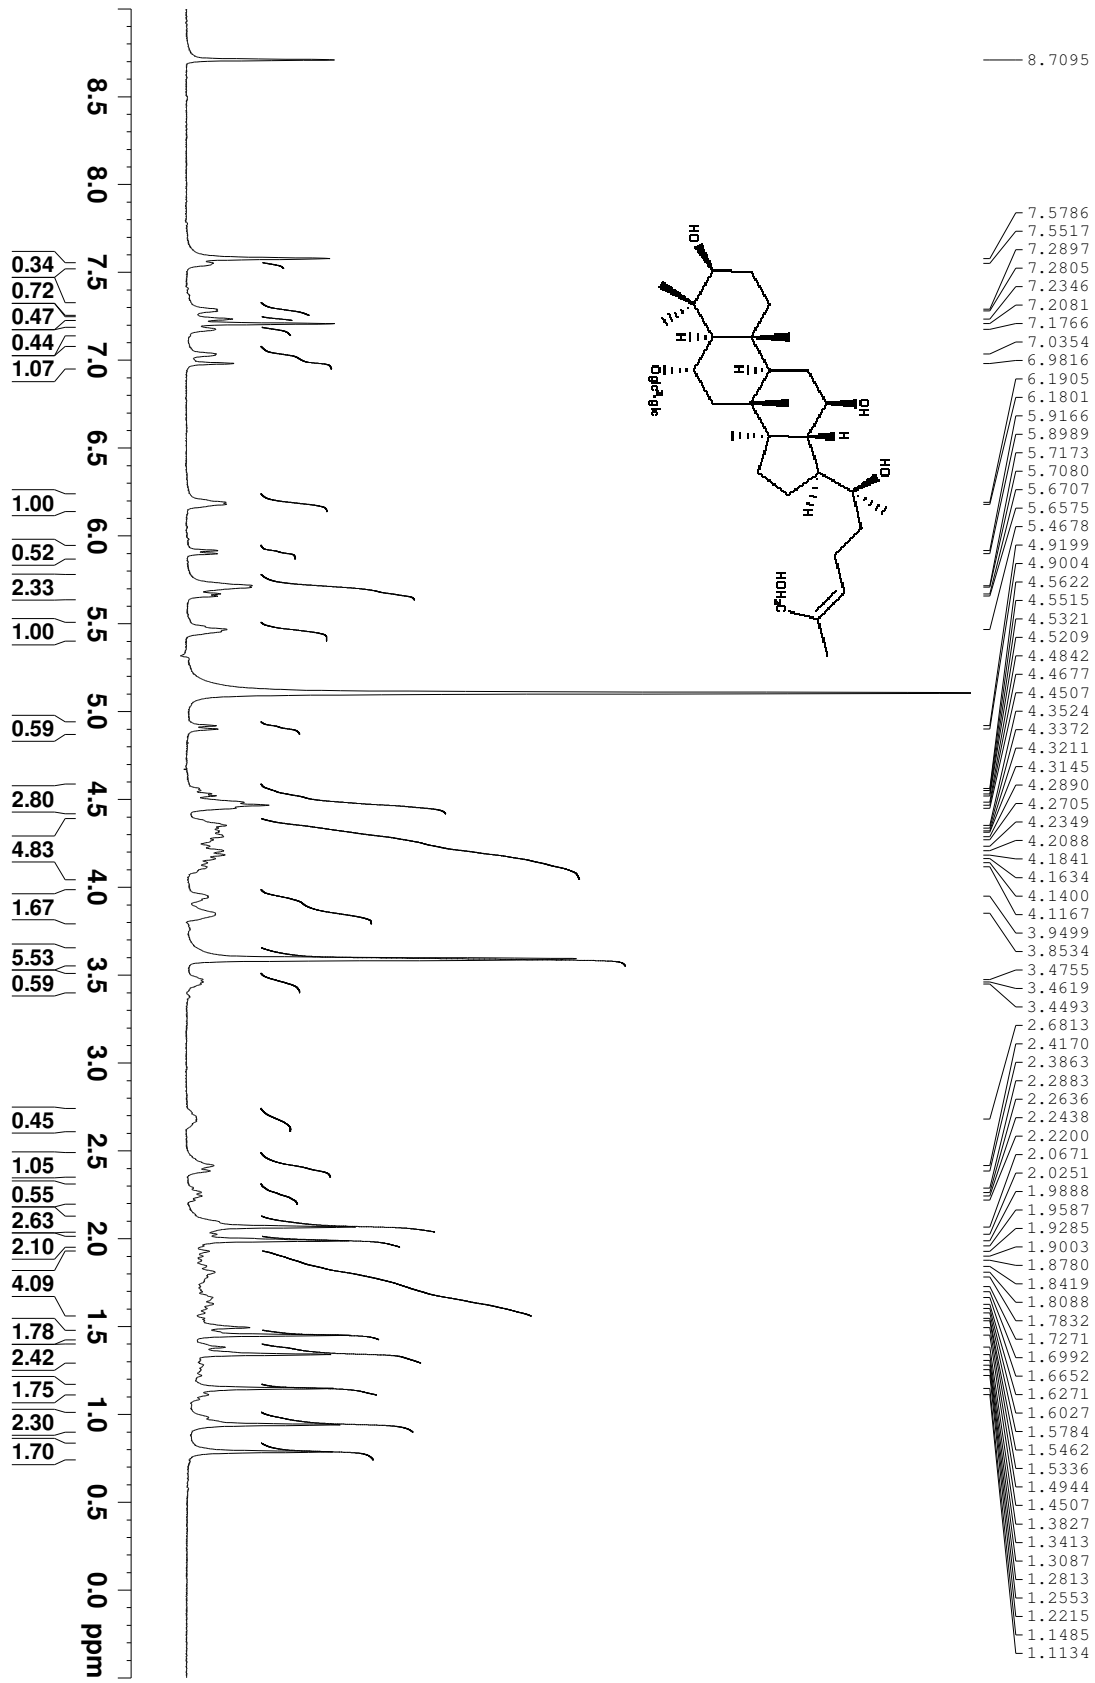

<sup>13</sup>C-NMR spectrum of panajaponol A (1)

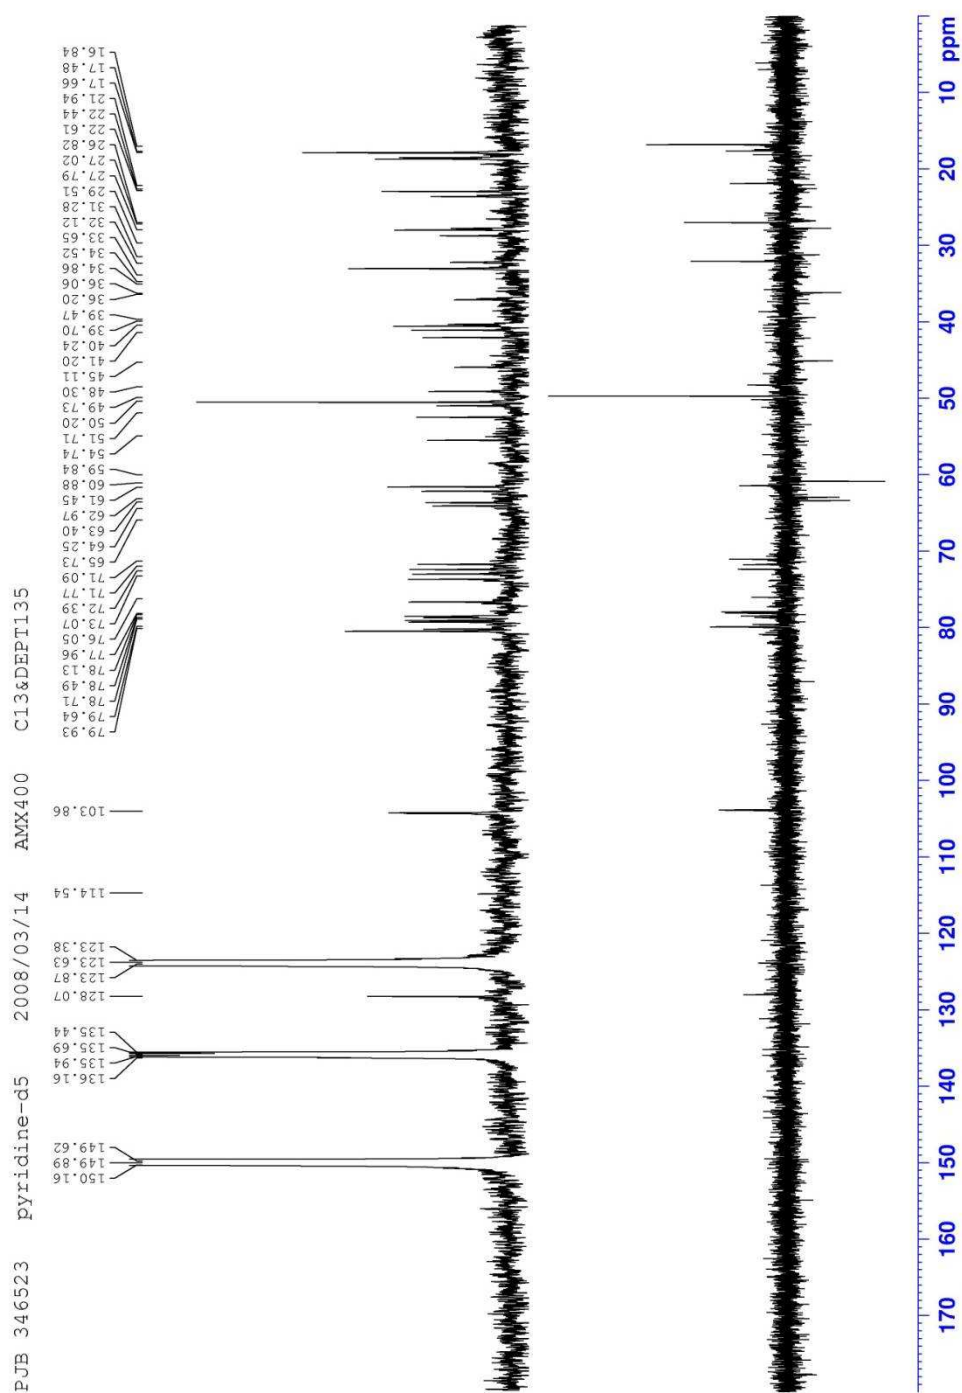

COSY spectrum of panajaponol A (1)

COSY\_PJB346523

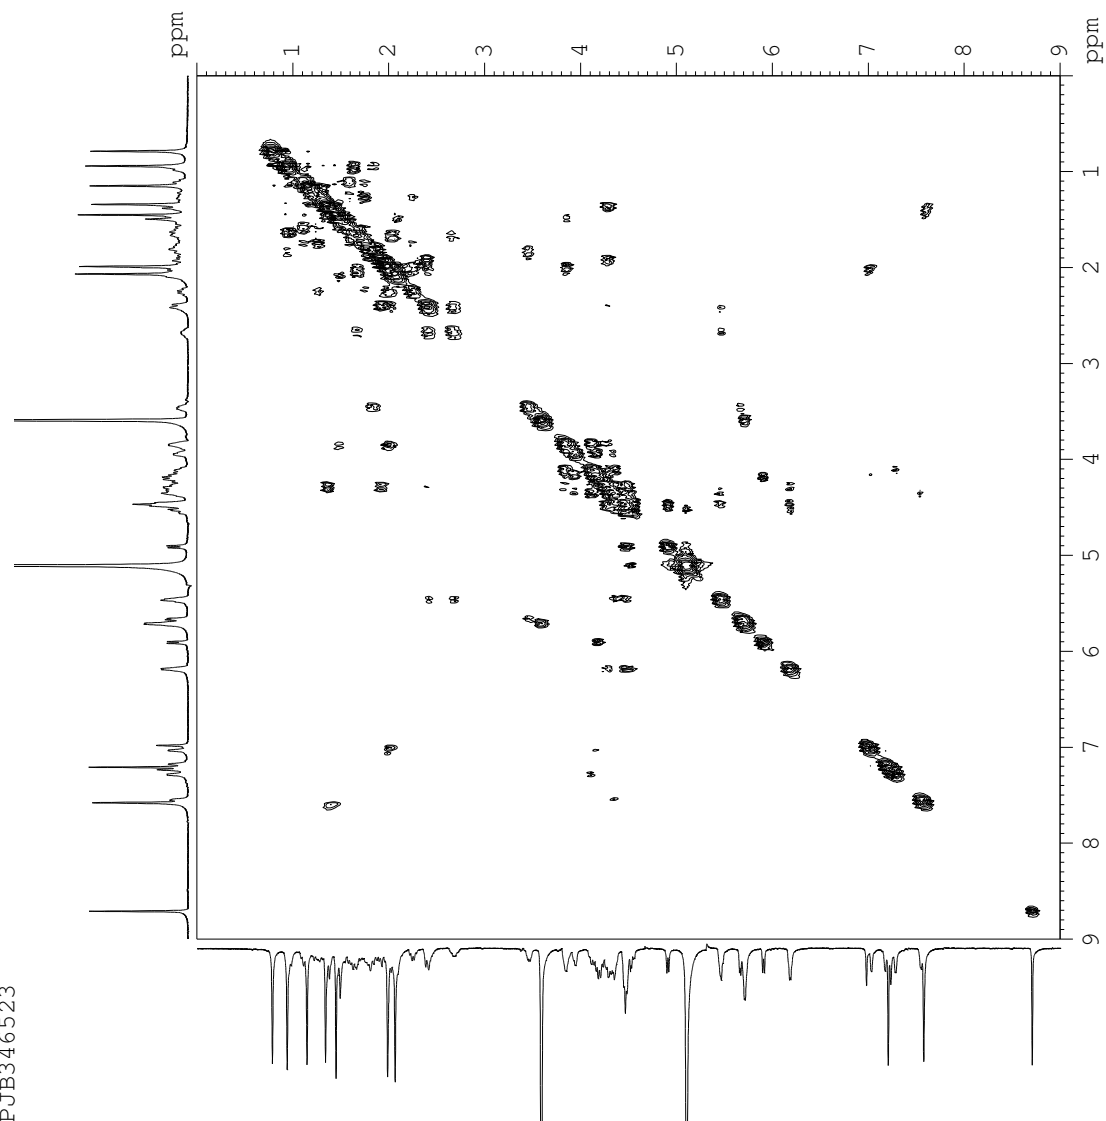

NOESY spectrum of panajaponol A (1)

NOESY PJB346523

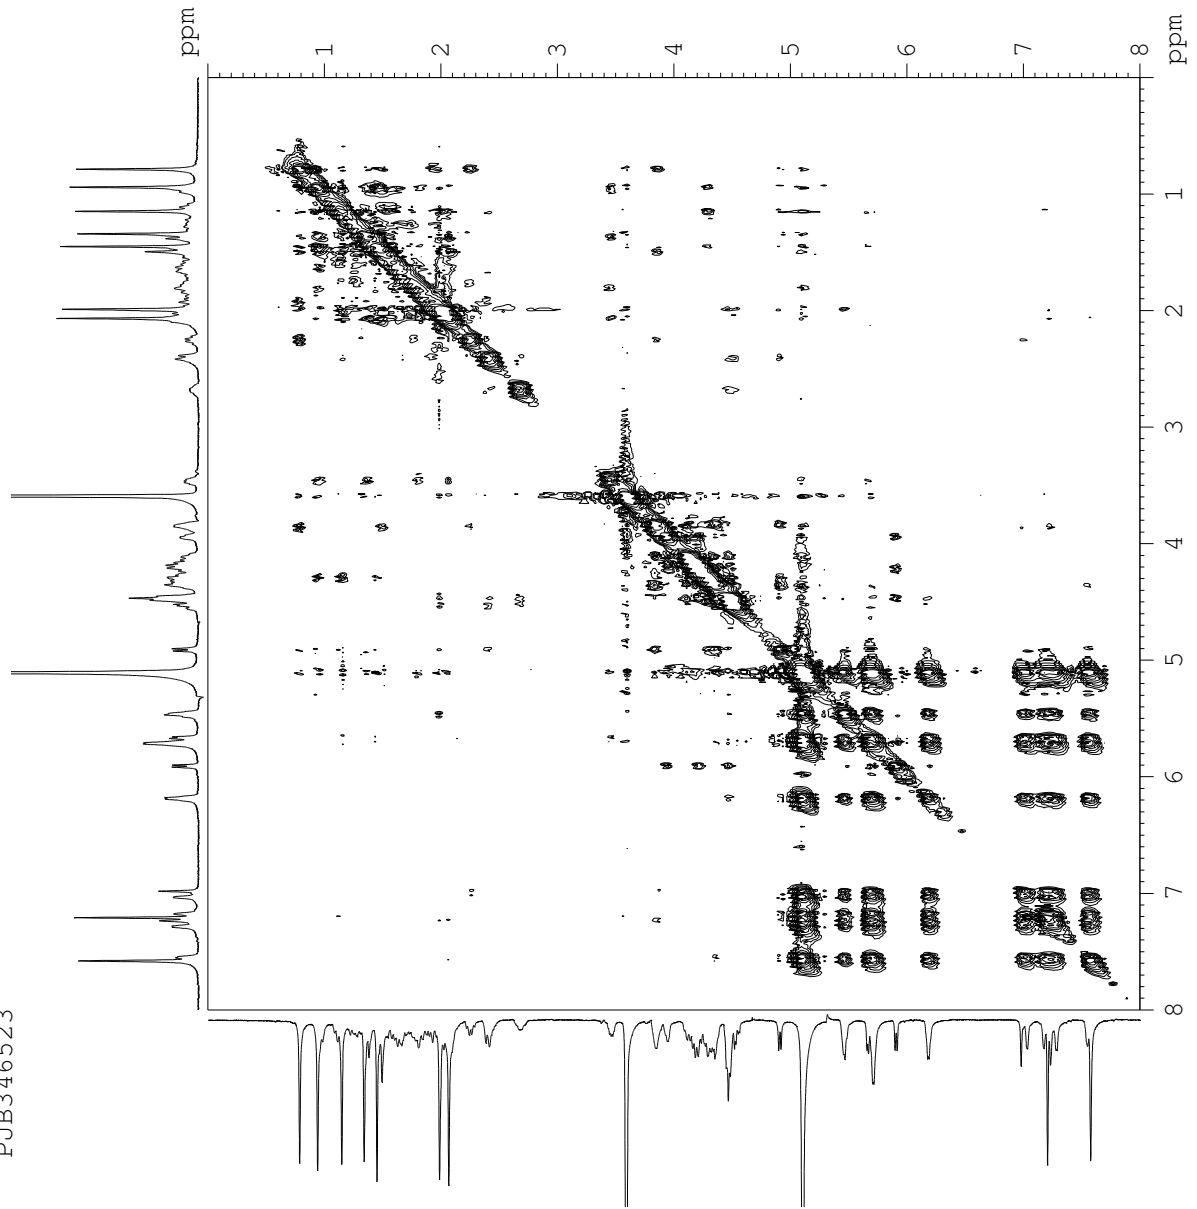

HMQC spectrum of panajaponol A (1)

HMQC PJB346523

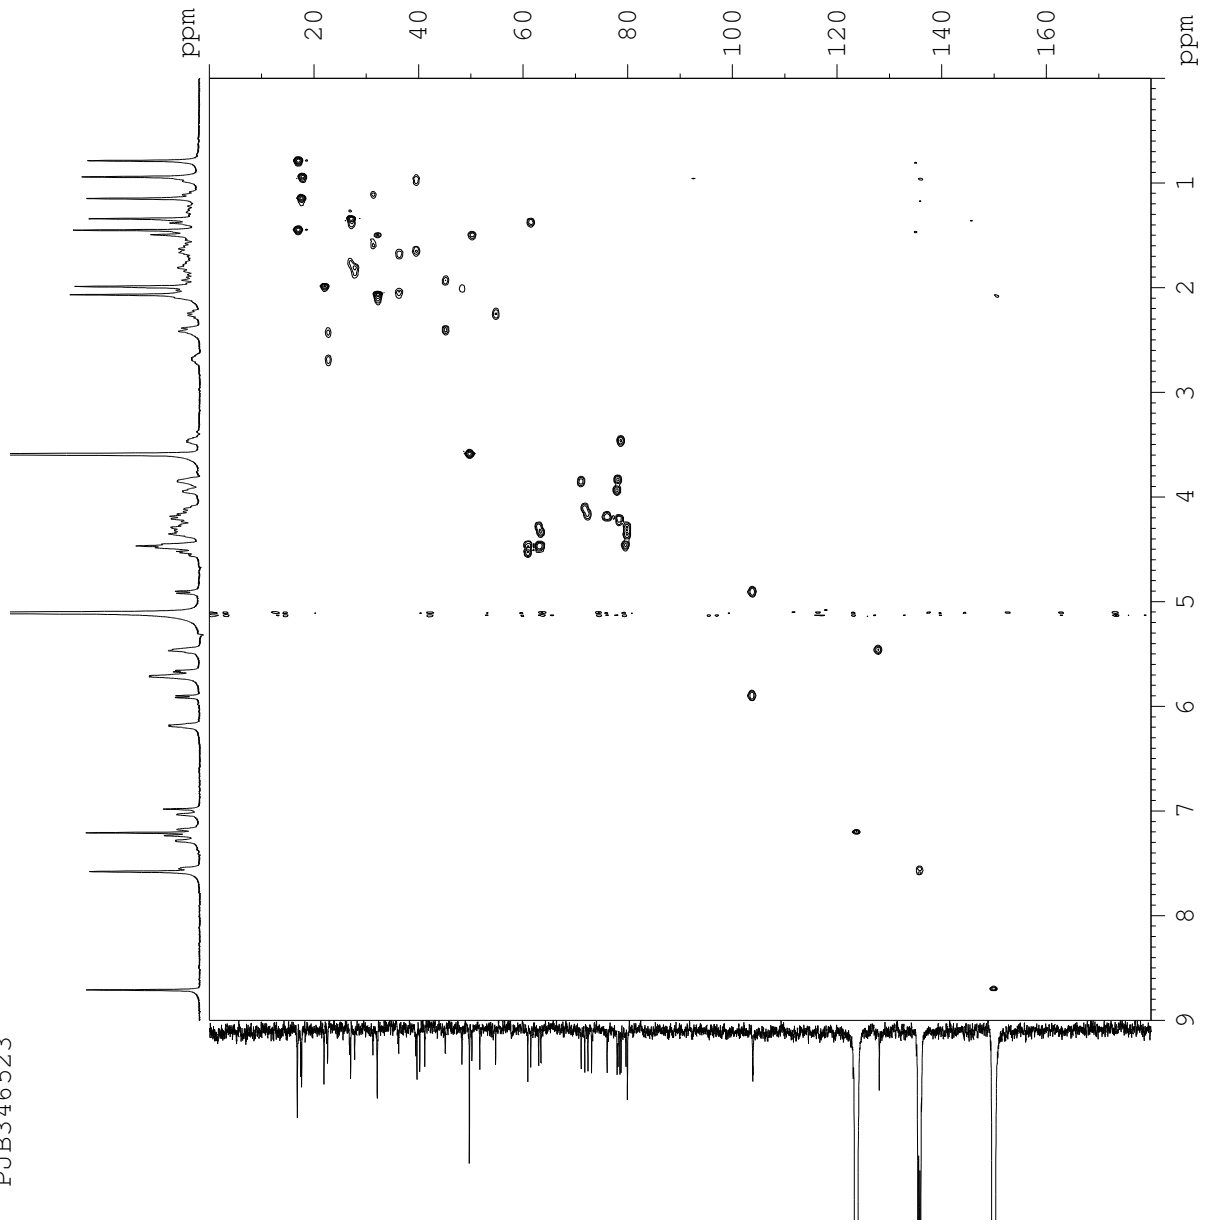

HMBC spectrum of panajaponol A (1)

HMBC PJB346523

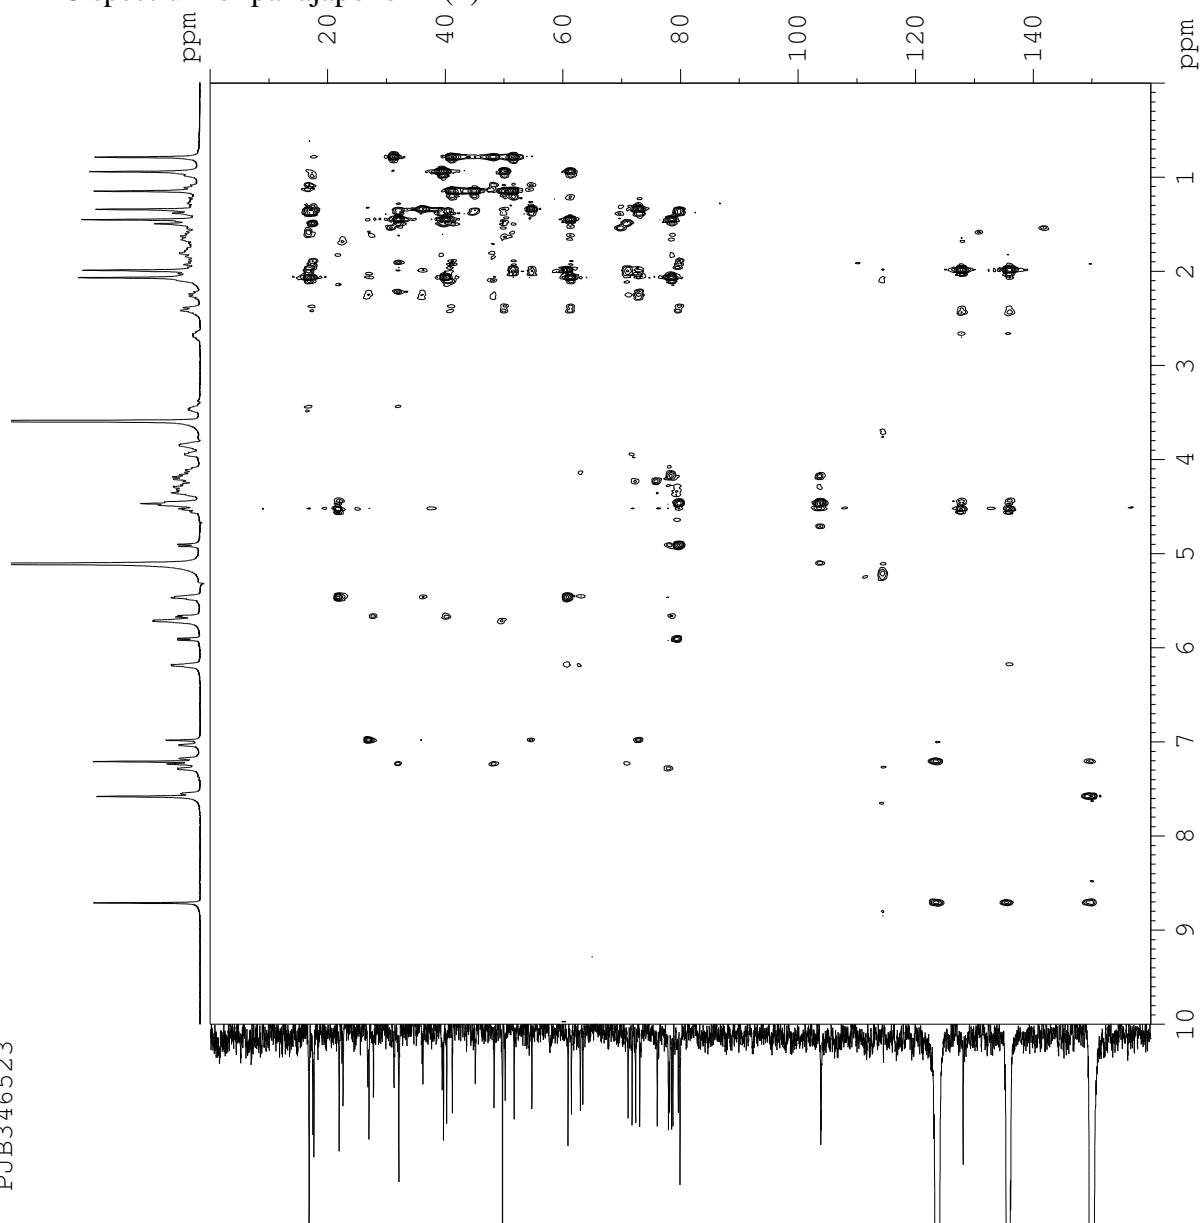

PJB667431 pyridine-d5 2008/05/19 AMX400

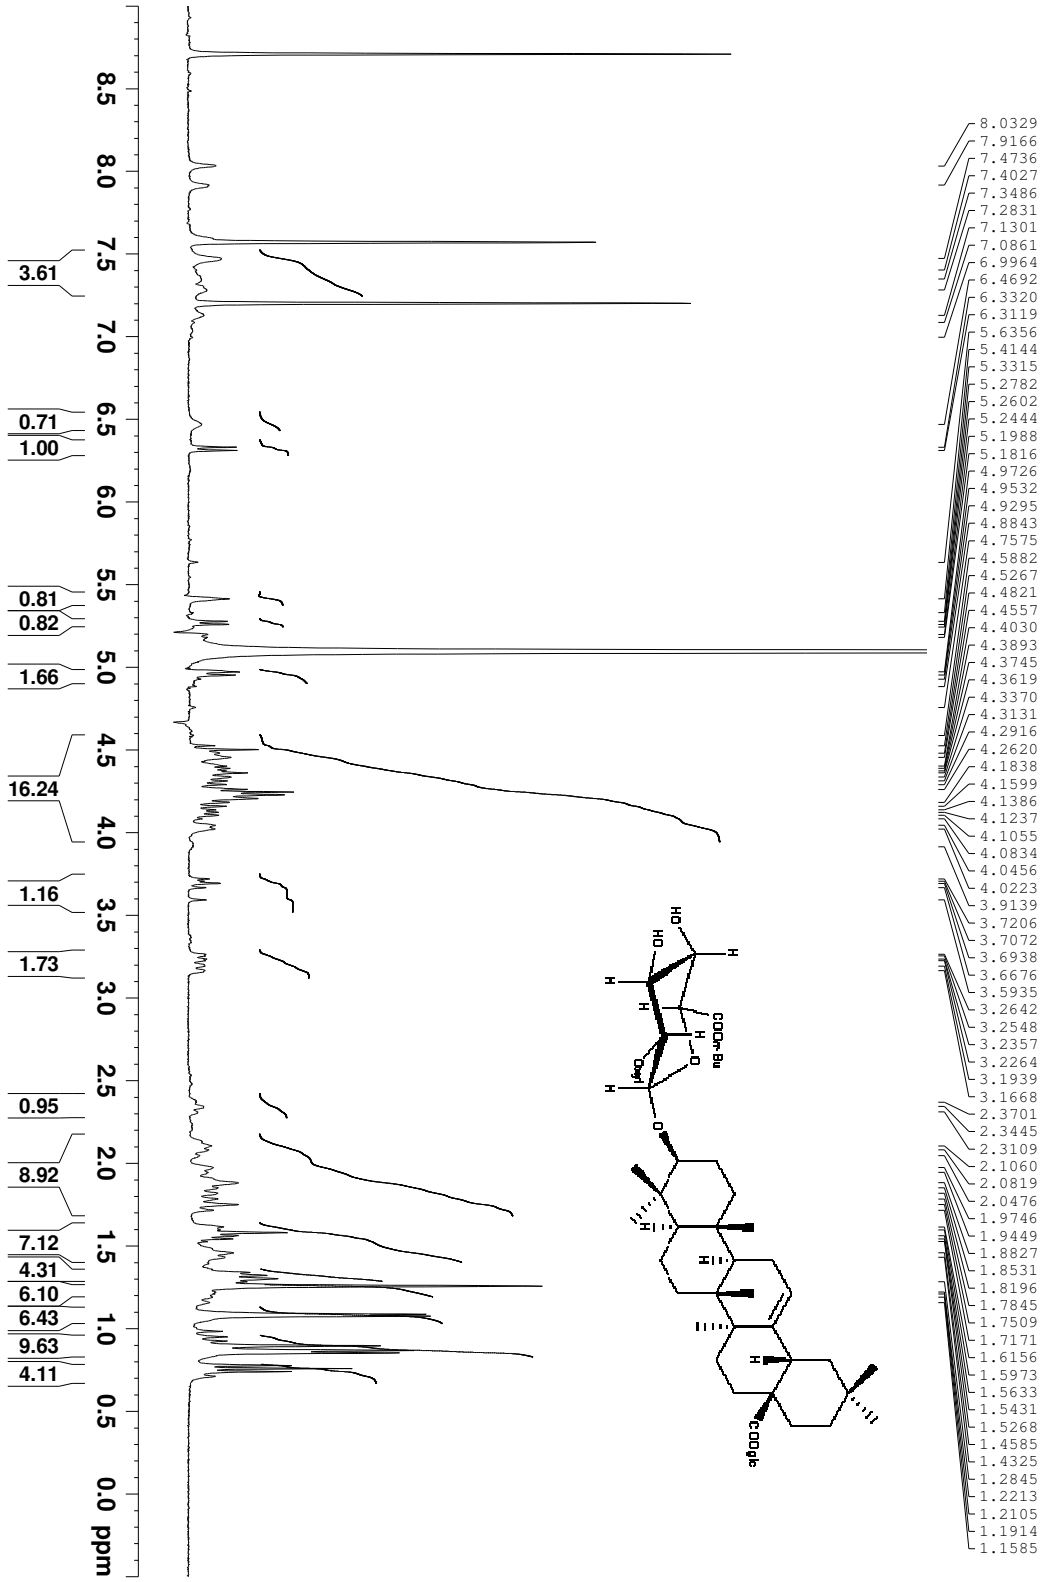

<sup>1</sup>H-NMR spectrum of pseudoginsenoside RT1 butyl ester (2)



<sup>13</sup>C-NMR spectrum of pseudoginsenoside RT1 butyl ester (2)

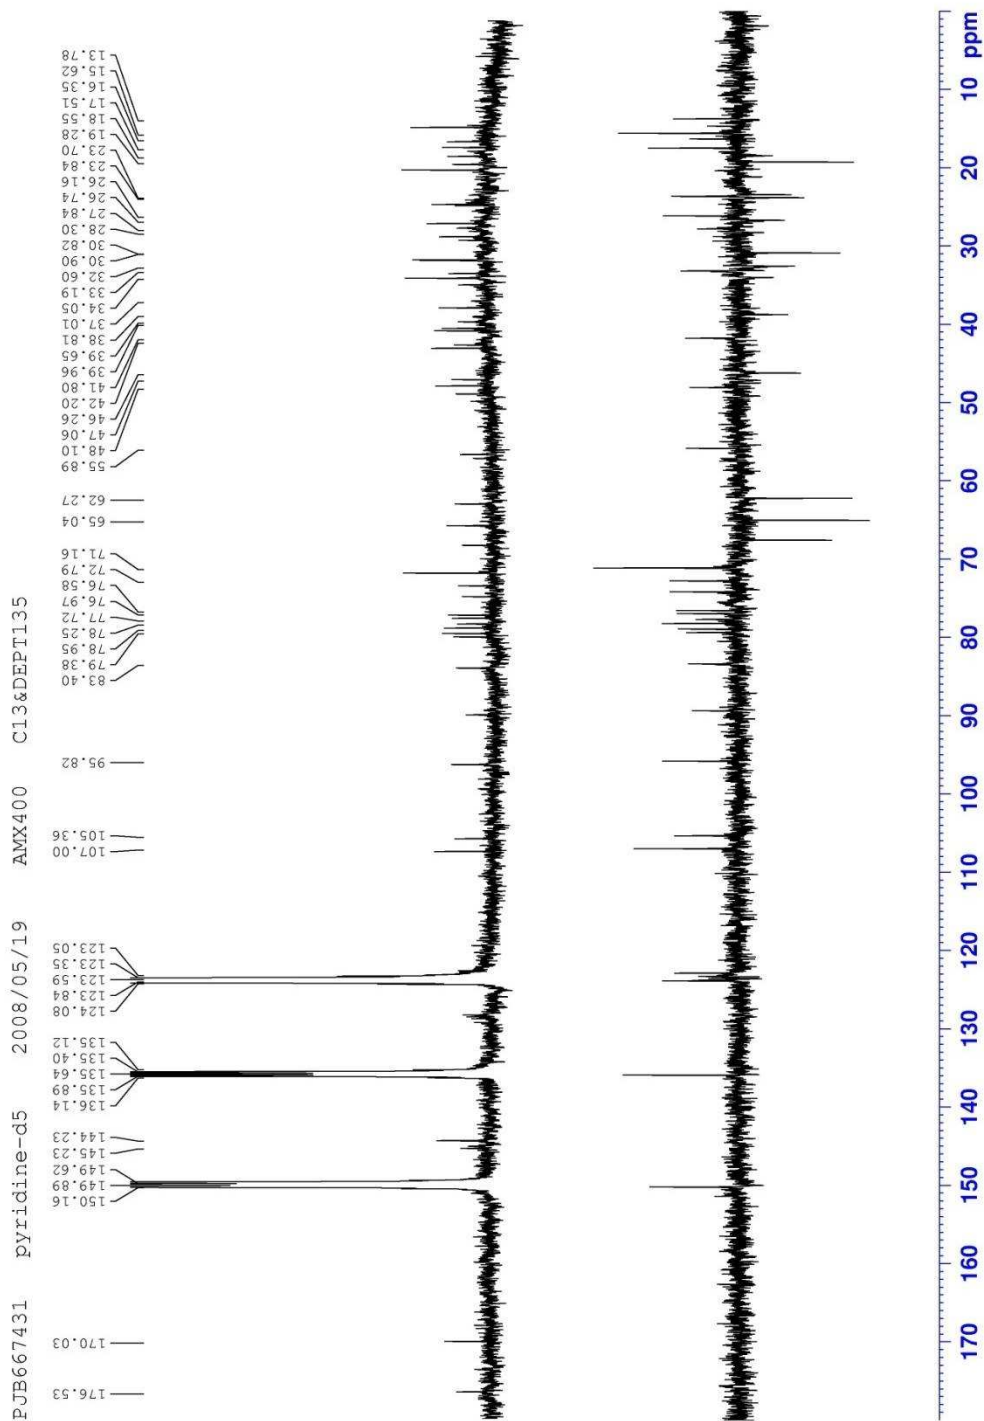

COSY spectrum of pseudoginsenoside RT1 butyl ester (2)

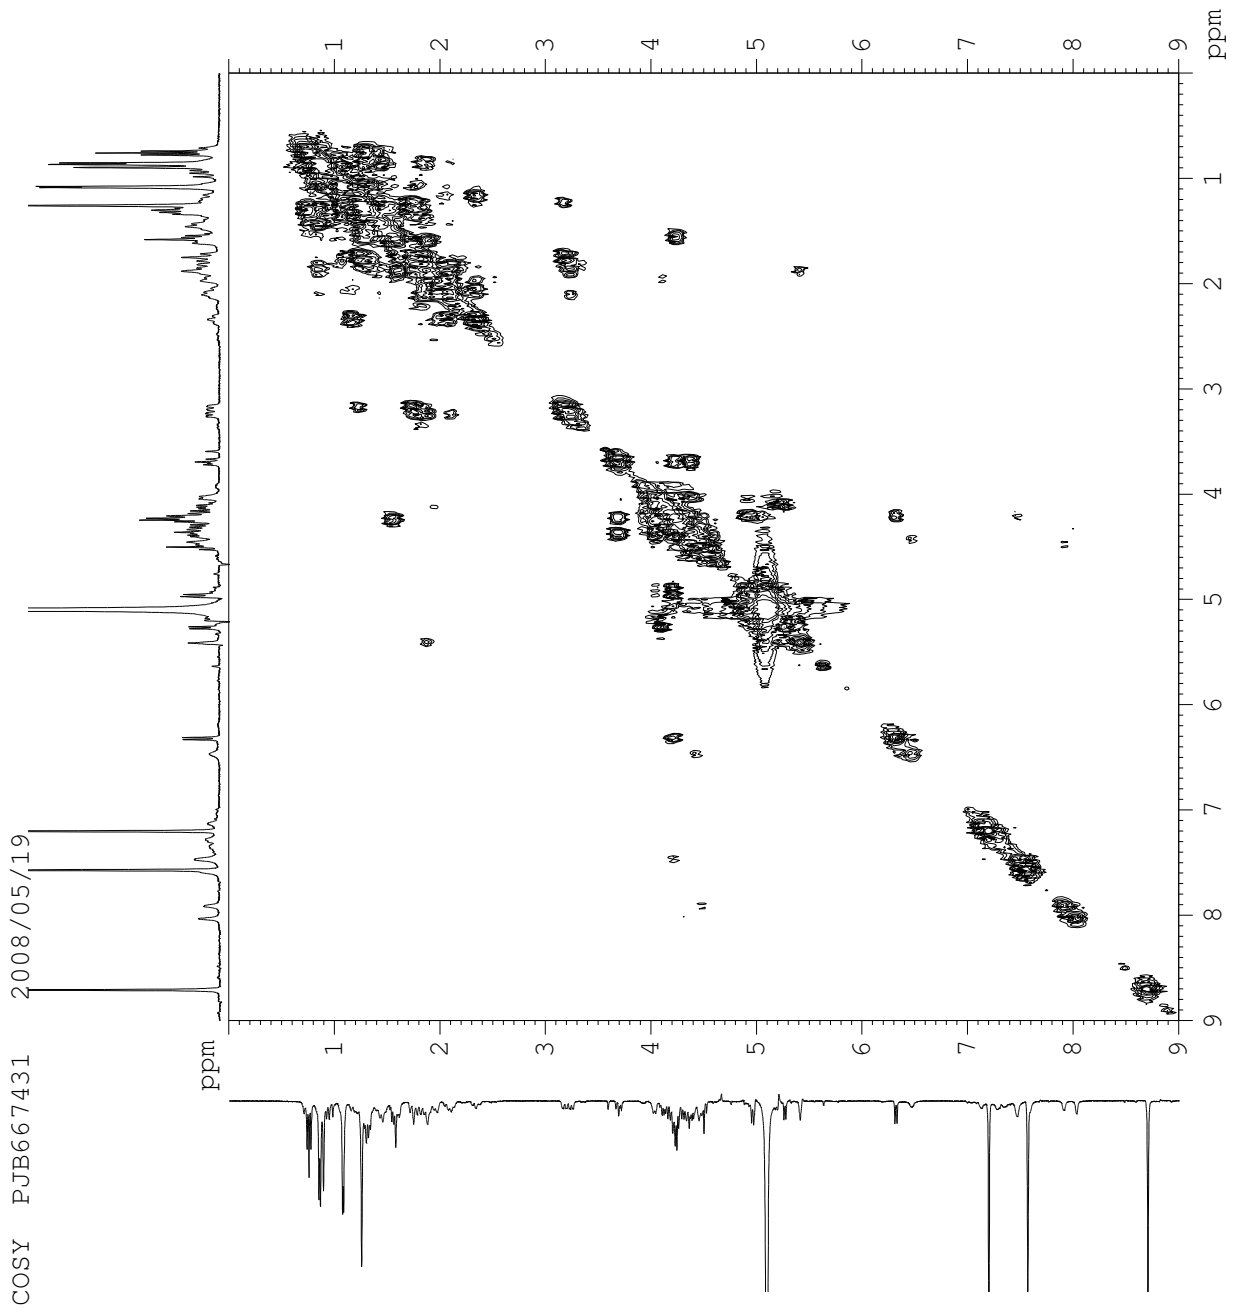

NOESY spectrum of pseudoginsenoside RT1 butyl ester (2)

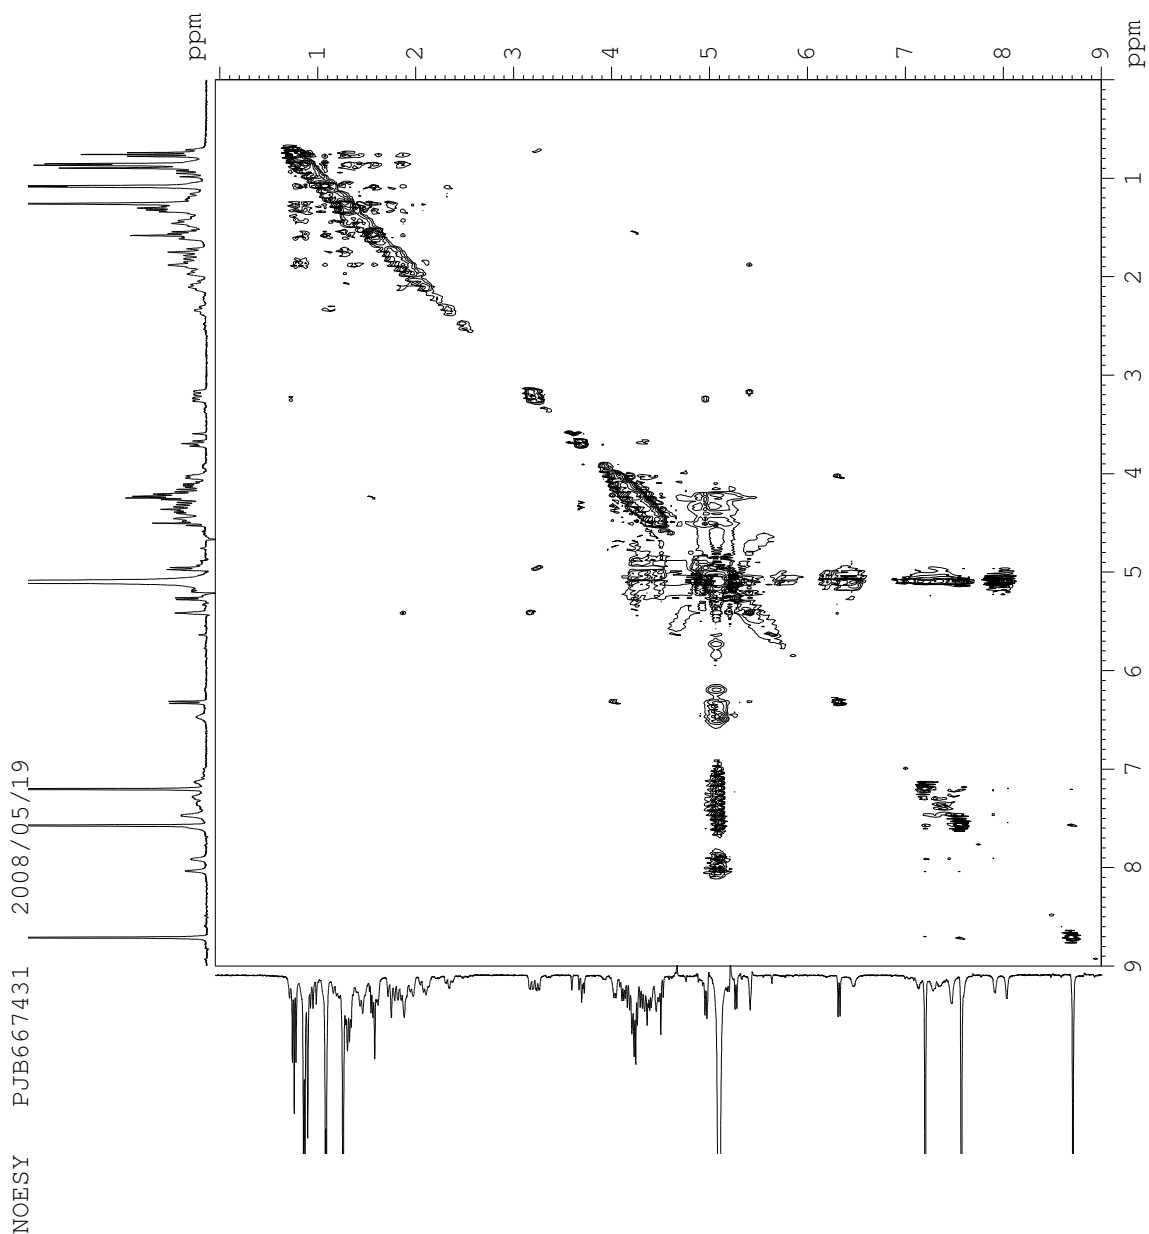

HMQC spectrum of pseudoginsenoside RT1 butyl ester (2)

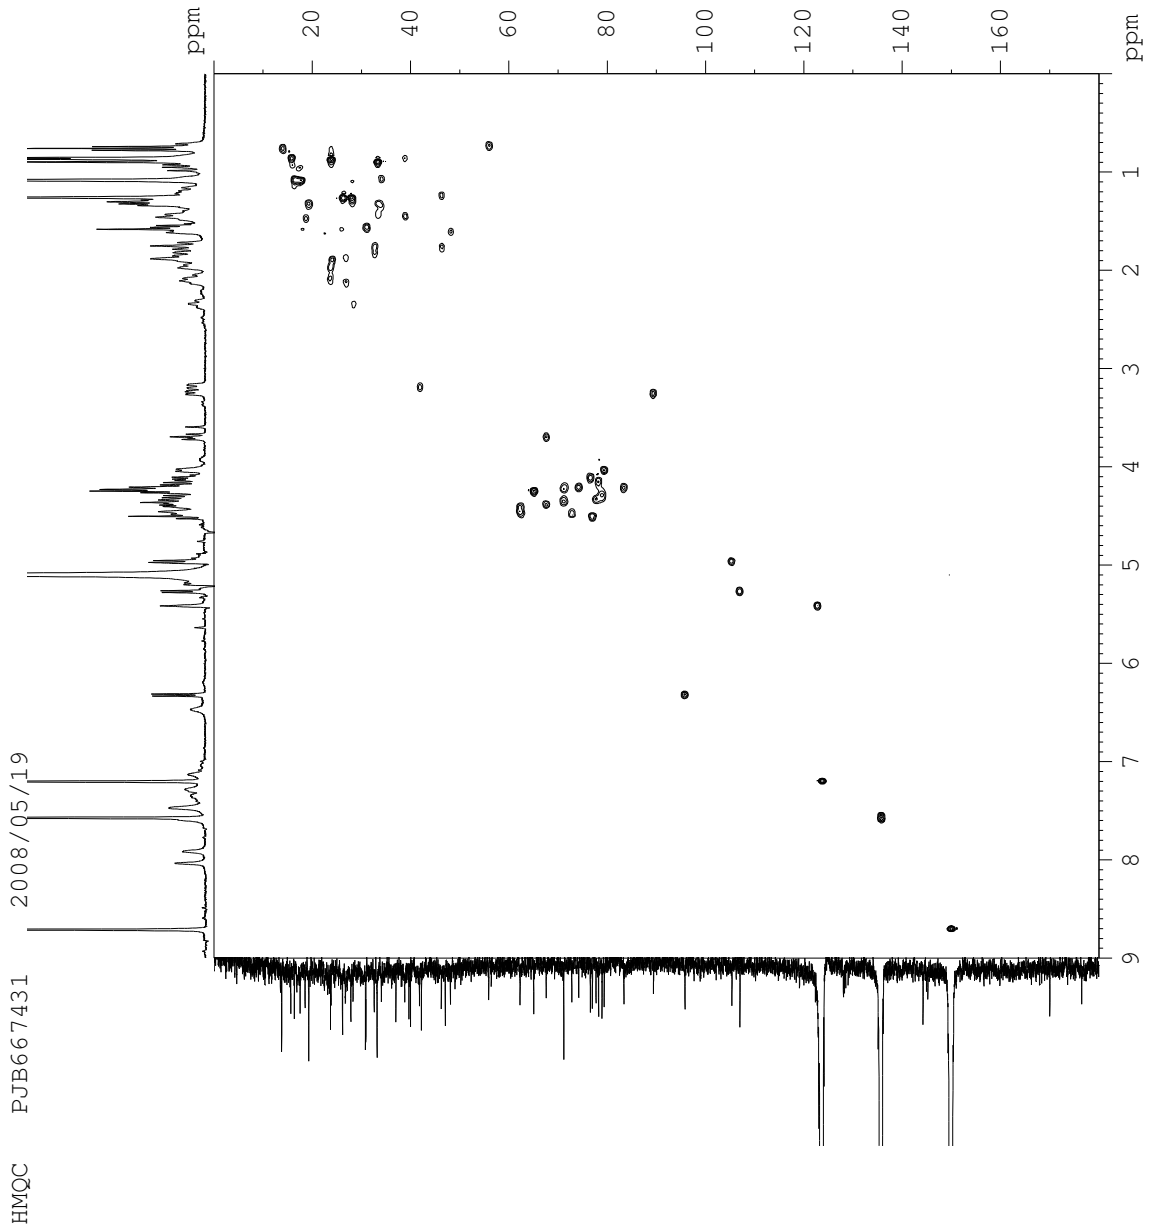

HMBC spectrum of pseudoginsenoside RT1 butyl ester (2)

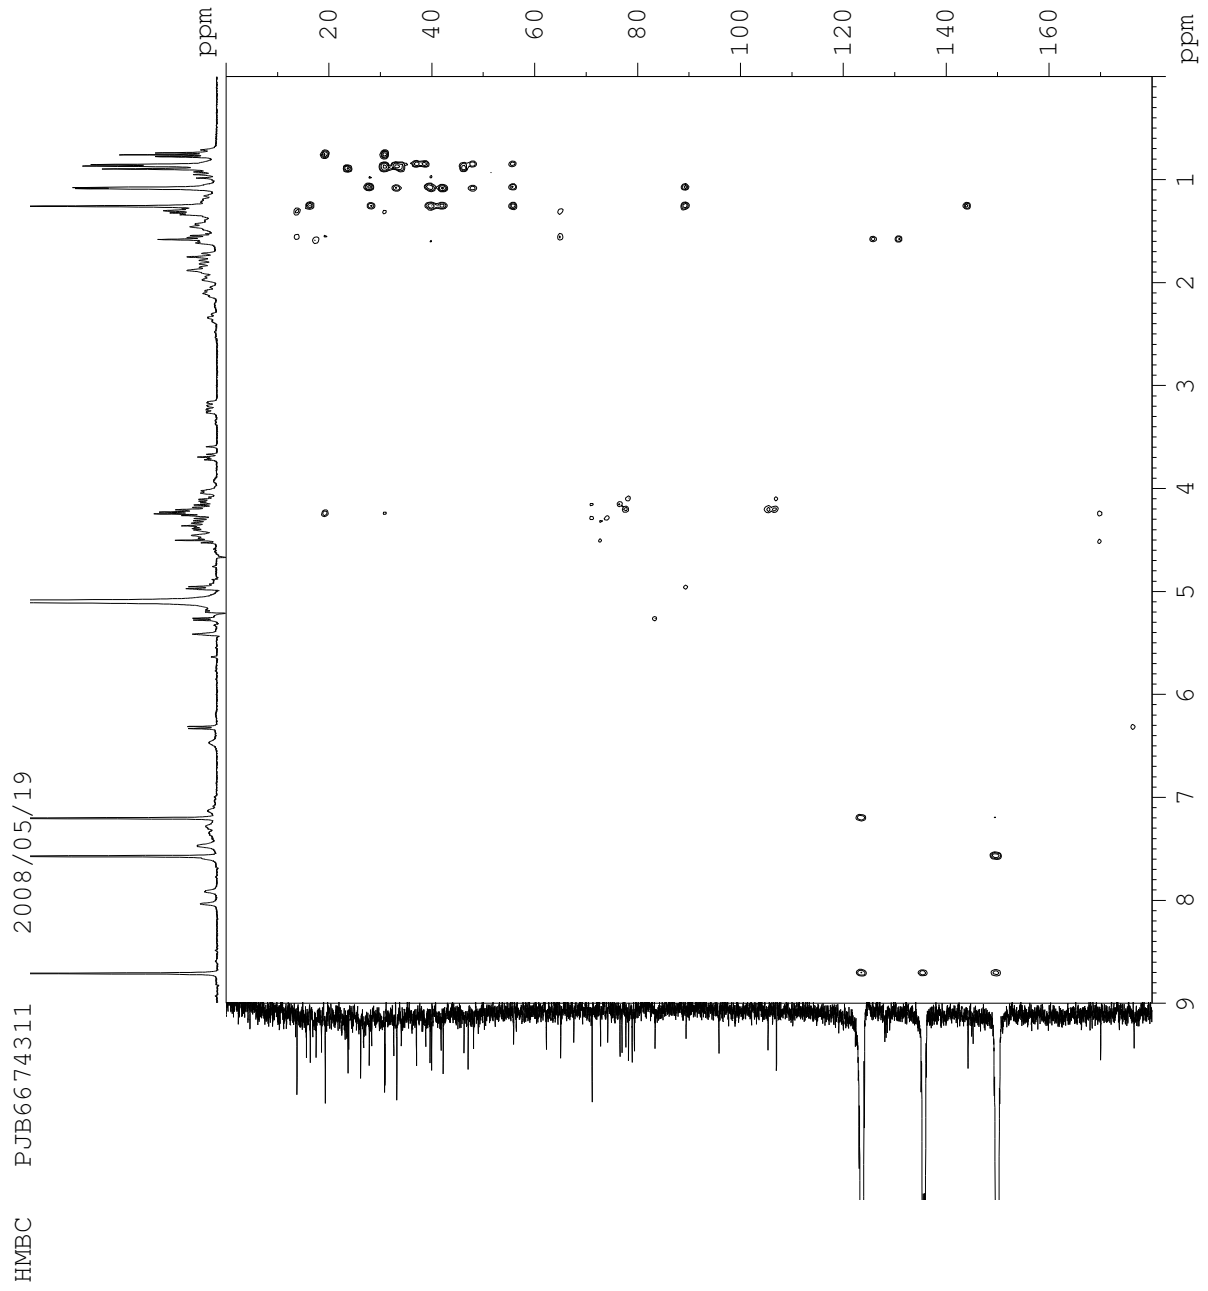

Supplement: NIHMS282392-supplement-1_si_001.pdf [file NIHMS282392-supplement-1_si_001.pdf]
